# Supplementary material for: Ten-year postintervention follow-up of adolescents participating in the management of overweight and social inequalities (PRALIMAP-INÈS intervention): the PRALIMAP-CINeCO survey protocol
Source: PubMed Central journal article supplement — BMJ Open. 2024 Sep 12;14(9):e083090. doi: 10.1136/bmjopen-2023-083090 (PMC11404294; doi:10.1136/bmjopen-2023-083090), 2024-09-12
Supplement: bmjopen-14-9-s001.pdf [file bmjopen-14-9-s001.pdf]

Supplementary material. SPIROS checklist

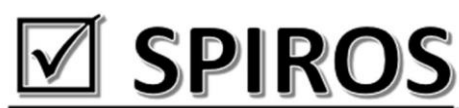

Standardized Protocol Items Recommendations for Observational Studies

| Section / Item                        | Item Number                 | Description                                                                                                          | Page           |
|---------------------------------------|-----------------------------|----------------------------------------------------------------------------------------------------------------------|----------------|
| <b>Part A: General information</b>    |                             |                                                                                                                      |                |
| Title                                 | 1 <input type="checkbox"/>  | Descriptive title Identifying study design in the title                                                              | 1 (Title page) |
| Protocol version                      | 2 <input type="checkbox"/>  | Version or amendment number with date and summary of the changes                                                     | 1 (Title page) |
| Protocol summary                      | 3 <input type="checkbox"/>  | An informative and balanced summary of the study protocol                                                            | 2              |
| Sponsor and funder details            | 4 <input type="checkbox"/>  | Name of Sponsor and funder and types of financial, material, and other support                                       | 21             |
| Conflict of interest statements       | 5 <input type="checkbox"/>  | Statement about any financial and other competing interests for principal or co-investigators for the overall study. | 21             |
| Investigators name                    | 6a <input type="checkbox"/> | Names of the principal and co-investigators                                                                          | 1 (Title page) |
| Affiliation of investigators          | 6b <input type="checkbox"/> | Affiliated institutions of the investigators                                                                         | 1 (Title page) |
| Principal researcher/s contact detail | 6c <input type="checkbox"/> | Name, e-mail address, affiliation of principal researcher                                                            | 1 (Title page) |
| <b>Part B: Introduction</b>           |                             |                                                                                                                      |                |
| Background of the study               | 7a <input type="checkbox"/> | Description of research question and scientific background of the study                                              | Pages 4-6      |
| Review of prior research              | 7b <input type="checkbox"/> | Summary of relevant existing research (published or unpublished)                                                     | Pages 4-6      |
| Rationale of study                    | 7c <input type="checkbox"/> | Justification for conducting the study                                                                               | Pages 4-6      |
| Aim                                   | 8a <input type="checkbox"/> | Broader aims and overall objective                                                                                   | Page 6         |

|                                                 |     |                          |                                                                                                                                                                                                                                                                                                                                                          |                      |
|-------------------------------------------------|-----|--------------------------|----------------------------------------------------------------------------------------------------------------------------------------------------------------------------------------------------------------------------------------------------------------------------------------------------------------------------------------------------------|----------------------|
| Objective /s of the study                       | 8b  | <input type="checkbox"/> | Primary and secondary objective/s including any prespecified hypothesis (if applicable).                                                                                                                                                                                                                                                                 | Pages 6-7-8          |
|                                                 | 8c  | <input type="checkbox"/> | Specify whether the intention is to (a) estimate causal effects, (b) predict outcomes, or (c) simple description.                                                                                                                                                                                                                                        | Pages 6-7-8          |
| <b>Part C: Methods</b>                          |     |                          |                                                                                                                                                                                                                                                                                                                                                          |                      |
| Study design                                    | 9a  | <input type="checkbox"/> | Description of study design (case control, cross-sectional or cohort) and type of study (retrospective cohort study, Prospective cohort study etc)                                                                                                                                                                                                       | Pages 8-9            |
| Study setting                                   | 9b  | <input type="checkbox"/> | Description of the study setting (e.g., community-based, hospital based) and detail of precise locations of the study sites                                                                                                                                                                                                                              | Pages 8-9            |
| Study schedule                                  | 10a | <input type="checkbox"/> | Description of the expected schedule of the study including relevant dates, expected periods of recruitment/survey, exposure, follow-up, and data collection.                                                                                                                                                                                            | Pages 8-9, Figure 1  |
|                                                 | 10b | <input type="checkbox"/> | Figure (Study schematic/flow-chart) or table describing expected time frame for each step including trainings, data collection, follow-up, analysis and reporting etc.                                                                                                                                                                                   | Pages 8-9, Figure 1  |
| Sample size                                     | 11  | <input type="checkbox"/> | Estimation of minimum sample size required for the study with justifications including clinical and statistical assumptions supporting any sample size calculations.                                                                                                                                                                                     | Pages 9-10, Figure 2 |
| Sampling procedure                              | 12  | <input type="checkbox"/> | Detailed description of the sampling frame and sampling strategy (simple random, stratified random, cluster, systematic etc.)                                                                                                                                                                                                                            | Pages 9-10, Figure 2 |
| <b>Participant selection</b>                    |     |                          |                                                                                                                                                                                                                                                                                                                                                          |                      |
| Participant selection for cohort study          | 13a | <input type="checkbox"/> | Description of inclusion and exclusion criteria, and the source and methods of participant selection (exposed and unexposed). For matched cohort studies, give matching criteria and number of exposed and unexposed.                                                                                                                                    | Pages 9-10           |
| Participant selection for case-control study    | 13b | <input type="checkbox"/> | Description of inclusion and exclusion criteria, and the source and methods of case ascertainment and control selection.<br>Give the rationale for the choice of cases and controls.<br>Give diagnostic criteria for identifying cases (if applicable).<br>For matched case-control studies, give matching criteria and the number of controls per case. | NA                   |
| Participant selection for cross-sectional study | 13c | <input type="checkbox"/> | Description of the inclusion and exclusion criteria, and the source and methods of participant selection.                                                                                                                                                                                                                                                | NA                   |
| Variables                                       | 14a | <input type="checkbox"/> | Detailed description of all important baseline and outcome variables to be analysed, exposures, predictors, potential confounders, and effect modifiers. Give diagnostic criteria, if applicable.                                                                                                                                                        | Pages 10-14          |
| Data sources/measurement                        | 14b | <input type="checkbox"/> | For each variable of interest, give sources of data and details of assessment / measurement methods. Describe comparability of assessment methods if there is more than one group.                                                                                                                                                                       | Pages 10-14          |
| Data collection                                 | 15a | <input type="checkbox"/> | Plans for assessment and collection of outcomes, baseline, follow up and other study related data.                                                                                                                                                                                                                                                       | Pages 10-14          |

|                                               |     |   |                                                                                                                                                                                                                                                                                                               |                     |
|-----------------------------------------------|-----|---|---------------------------------------------------------------------------------------------------------------------------------------------------------------------------------------------------------------------------------------------------------------------------------------------------------------|---------------------|
| and management                                | 15b | □ | Description of data collection methods e.g., online survey, Household survey, paper based or electronic data capture etc.                                                                                                                                                                                     | Pages 10-14         |
|                                               | 15c | □ | Any related processes to promote data quality during data collection (e.g., duplicate measurements, training of assessors, validation method)                                                                                                                                                                 | Pages 10-14         |
|                                               | 15d | □ | Description of study instruments (e.g., questionnaires, data collection forms) along with their reliability and validity, if known. Reference to where data collection forms can be found, if not in the protocol.                                                                                            | Pages 10-14         |
|                                               | 15e | □ | Plans for data entry, coding, security, and storage, including any related processes to promote data quality (e.g., electronic data capture, double data entry; range checks for data values, random cross-checking of electronic data with the source documents).                                            | Pages 10-14, 21     |
|                                               | 15f | □ | Reference to where details of data management procedures can be found, if not in the protocol.                                                                                                                                                                                                                | Page 22             |
| Blinding procedure (if blinded study)         | 16  | □ | Description of blinding procedure (if applicable) reporting Who will be blinded (e.g., investigator blinded for disease status when measuring exposure in case-control study) and methods to ensure blinding and unmasking of blinding if required.                                                           | NA                  |
| Potential bias                                | 17  | □ | Description of any potential biases and plan to minimize those potential sources of biases.                                                                                                                                                                                                                   | Pages 9,10,14 15-18 |
| Statistical analysis plan                     | 18  | □ | Detailed description of methods for analysing and presenting primary/secondary outcomes and any additional analysis (e.g. analyses of subgroups and interactions, and sensitivity analyses). Give reference to the where other details of the statistical analysis plan can be found, if not in the protocol. | Pages 15-18         |
| Handling of missing data                      | 19  | □ | Detailed description of methods to handle missing data (e.g. multiple imputation).                                                                                                                                                                                                                            | Page 15             |
| Handling of withdrawals and lost to follow up | 20a | □ | Detailed description of the procedures to be followed when a participant ceases participation in the study prematurely or is lost to follow up                                                                                                                                                                | Pages 9-10          |
| Replacements                                  | 20b | □ | Plans and methods of the replacement or substitution of withdrawn participants.                                                                                                                                                                                                                               | NA                  |
| Outcome                                       | 21  | □ | Definition and description of all primary, secondary and other outcomes.                                                                                                                                                                                                                                      | Pages 7-8           |
| Data confidentiality statement                | 22  | □ | A detailed description of process to ensure data confidentiality.                                                                                                                                                                                                                                             | Page 21             |
| Follow up                                     | 23  | □ | A detailed plan of follow up including schedule and methods (telephonic, house based, hospital based etc.) of follow up.                                                                                                                                                                                      | Pages 10-14         |
| Plan of study monitoring                      | 24  | □ | Description of plan for study monitoring and whether the monitoring will be independent from investigators or sponsors.                                                                                                                                                                                       | Page 10             |

|                                                                            |     |                          |                                                                                                                                                                                                                                                                               |              |
|----------------------------------------------------------------------------|-----|--------------------------|-------------------------------------------------------------------------------------------------------------------------------------------------------------------------------------------------------------------------------------------------------------------------------|--------------|
| Training of surveyors/data collectors                                      | 25  | <input type="checkbox"/> | Description of how investigators and surveyors will be trained to conduct the research activity.                                                                                                                                                                              | Pages 10, 13 |
| Quality assurance                                                          | 26  | <input type="checkbox"/> | Plan of quality assurance. back-checking data collection.                                                                                                                                                                                                                     | Page 10      |
| <b>Part D: Ethical consideration</b>                                       |     |                          |                                                                                                                                                                                                                                                                               |              |
| Ethical approval                                                           | 27a | <input type="checkbox"/> | Plan for seeking ethics approval from ethics committees/institutional review boards. If known, give name of ethical committees.                                                                                                                                               | Page 21      |
|                                                                            | 27b | <input type="checkbox"/> | If ethics approval will not be sought, give justification.                                                                                                                                                                                                                    | NA           |
| Consent and assent                                                         | 28a | <input type="checkbox"/> | Description of who will obtain informed consent or assent from potential study participants or authorized surrogates, and how (e.g., written informed consent, verbal consent, video/audio recording of consent procedure etc.)                                               | 9, 11        |
|                                                                            | 28b | <input type="checkbox"/> | Give reason if consent or assent not sought.                                                                                                                                                                                                                                  | NA           |
|                                                                            | 28c | <input type="checkbox"/> | Give reference to where informed consent forms and applicable translations plan can be found, if not in the protocol.                                                                                                                                                         | Page 22      |
| Risk/harm to participants                                                  | 29a | <input type="checkbox"/> | A detailed description of potential risks or harms to study participants.                                                                                                                                                                                                     | NA           |
|                                                                            | 29b | <input type="checkbox"/> | Plans for collecting, assessing, reporting, and managing any study procedures related adverse events (e.g. adverse events due to blood collection) and other unintended effects of study conduct (e.g. risk to breach confidential and sensitive information of participants) | Page 10      |
|                                                                            | 29c | <input type="checkbox"/> | Give a statement about whether data will be anonymous, pseudonymized, or can be directly linked to participants.                                                                                                                                                              | Page 10      |
|                                                                            | 29d | <input type="checkbox"/> | Description of any plan for giving Incentives to the participants                                                                                                                                                                                                             | NA           |
| Adverse event and serious adverse event reporting                          | 30  | <input type="checkbox"/> | Outline how adverse events and serious adverse events information will be collected and reported.                                                                                                                                                                             | Page 10      |
| Involvement of patient/participant representatives in protocol development | 31  | <input type="checkbox"/> | Patient and Public Involvement (PPI) statement including how patients or participants involved in the planning of the study. Give statement, if there is no plan to involve of patient/participants and public in designing or any phase of the study                         | Page 10      |
| <b>Part E. Reporting and dissemination</b>                                 |     |                          |                                                                                                                                                                                                                                                                               |              |
| Dissemination/                                                             | 32a | <input type="checkbox"/> | Plans for investigators and sponsor to communicate study results to ethical review boards, participants, key stakeholders, the public, and other relevant groups.                                                                                                             | Page 21      |

|                                                                                           |     |                          |                                                                                                                                                                                                                                                                                                                                                                                                 |                          |
|-------------------------------------------------------------------------------------------|-----|--------------------------|-------------------------------------------------------------------------------------------------------------------------------------------------------------------------------------------------------------------------------------------------------------------------------------------------------------------------------------------------------------------------------------------------|--------------------------|
| public<br>ation<br>plan                                                                   | 32b | <input type="checkbox"/> | Methods to communicate findings (e.g., via publication (openaccess or closed access), reporting in results databases, or other data-sharing arrangements), including any publication restrictions.                                                                                                                                                                                              | Page 21                  |
|                                                                                           | 32c | <input type="checkbox"/> | Define authorship eligibility guidelines (e.g., ICMJerecommendations)                                                                                                                                                                                                                                                                                                                           | Page 21                  |
| <b>Part F: Others</b>                                                                     |     |                          |                                                                                                                                                                                                                                                                                                                                                                                                 |                          |
| Whether Artificial Intelligence (AI) assisted technology was used in writing the protocol | 33  | <input type="checkbox"/> | Disclose whether authors used artificial intelligence (AI)-assisted technologies in the production of protocol (e.g., chatbots) or there is planning to use artificial intelligence (AI)-assisted technologies in the production of manuscript or study reports.                                                                                                                                | NA                       |
|                                                                                           | 34  | <input type="checkbox"/> | Give the name of AI tools (such as ChatGPT). Include a statement if authors did or did not review and edited thecontent created by AI-assisted technologies                                                                                                                                                                                                                                     | NA                       |
| References                                                                                | 35  | <input type="checkbox"/> | A complete list of references cited in protocol.                                                                                                                                                                                                                                                                                                                                                | Pages 23-32              |
| Funding                                                                                   | 36  | <input type="checkbox"/> | Source of any funding for the study and the role of thefunders for the study                                                                                                                                                                                                                                                                                                                    | Page 21                  |
| Open science                                                                              | 37a | <input type="checkbox"/> | <b>Registration of observational study:</b> Study identifier and registry name (e.g., open science framework, ClinicalTrials.gov, ICTRP or any other national or international study registry platform). If not yet registered, name ofintended registry.                                                                                                                                       | Pages 1 (Title page), 21 |
|                                                                                           | 37b | <input type="checkbox"/> | <b>Data sharing:</b> Plans, if any, for granting public access to the (1) full protocol and amendments, (2) participant-level data set, (3) Statistical analysis plan, (4) statistical codes and otherstudy material (e.g., case report forms, study questionnaires and Informed consent forms). Give reference to where thesedocuments can be found, if not included as annex in the protocol. | Page 22                  |
